# Supplementary figures and images for: Pax8 has a critical role in epithelial cell survival and proliferation
Source: PubMed Central journal article supplement — Cell Death Dis. 2013 Jul 18;4(7):e729–. doi: 10.1038/cddis.2013.262 (PMC3730432; doi:10.1038/cddis.2013.262), 2013-07-18

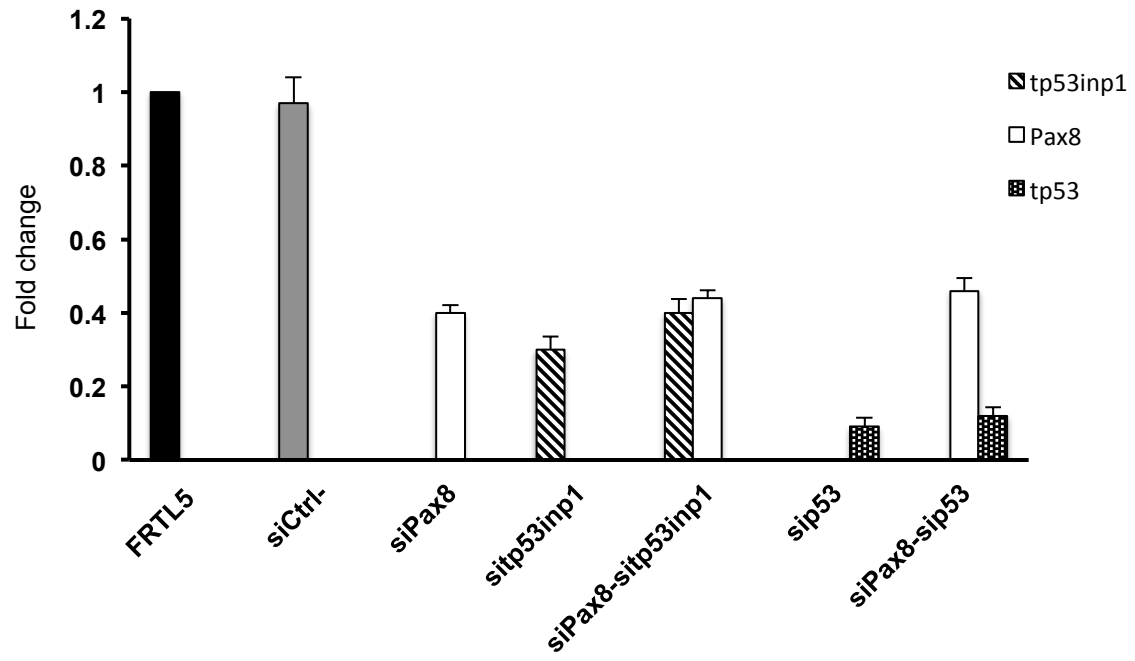

**SUPPL. Figure 2**

Supplement: cddis2013262x2.pdf [file cddis2013262x2.pdf]
